# Supplementary material for: In silico identification of effector proteins from generalist herbivore Spodoptera litura
Source: PubMed Central journal article supplement (PMC7681983; doi:10.1186/s12864-020-07196-4), 2020-11-23
Supplement: 12864_2020_7196_MOESM10_ESM.pdf [file 12864_2020_7196_MOESM10_ESM.pdf]

**Figure R1**

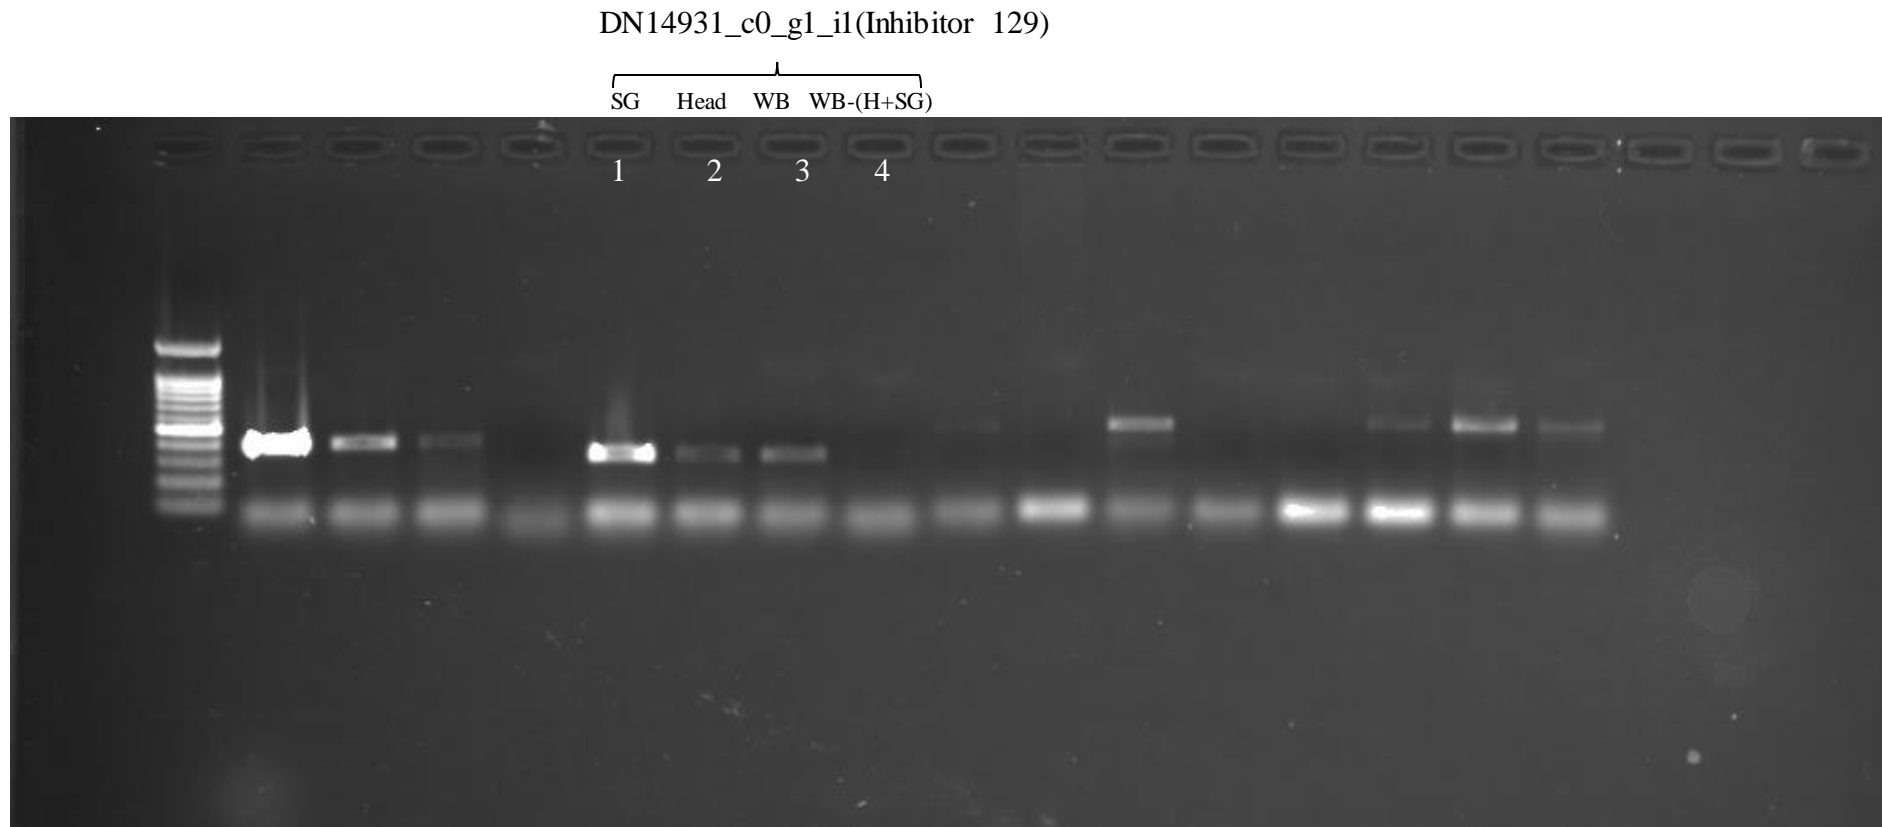

**Figure R1: RT-PCR amplification of potential effector encoding gene DN14931\_c0\_g1\_i1(Inhibitor).** The expression is checked in different tissues, SG (salivary gland), WB (whole body of insect), WB-(H+SG) (whole body without head and salivary gland). PCR samples were loaded into different wells denoted by numbers 1-4.

**Figure R2**

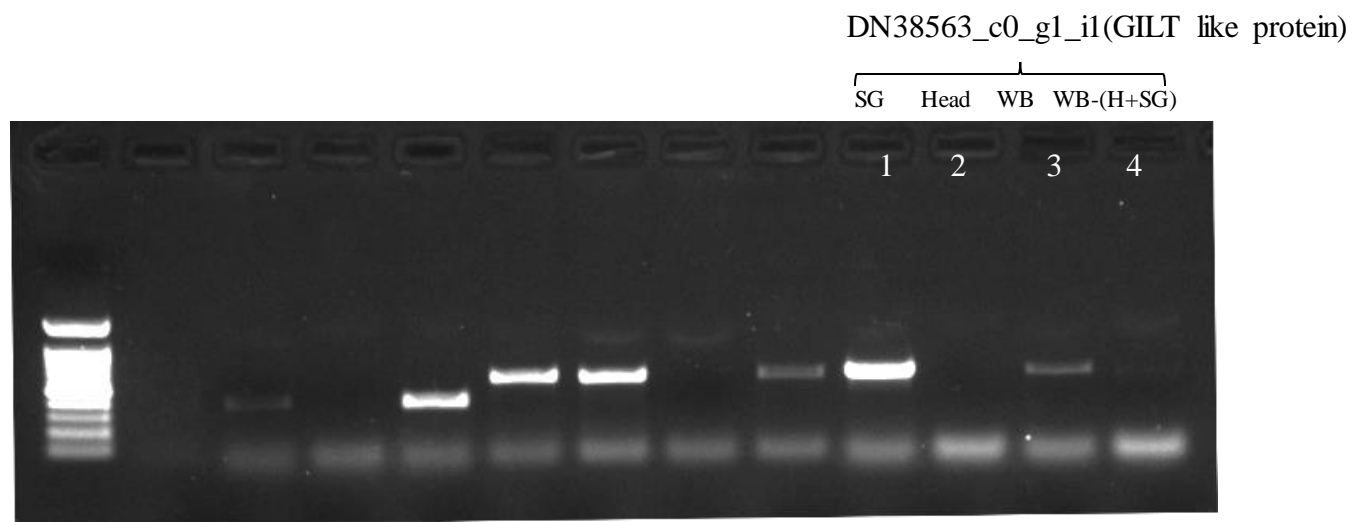

**Figure R2: RT-PCR amplification of potential effector encoding gene DN38563\_c0\_g1\_i1(GILT like protein).** The expression is checked in different tissues, SG (salivary gland), WB (whole body of insect), WB-(H+SG) (whole body without head and salivary gland). PCR samples were loaded into different wells denoted by numbers 1-4.

**Figure R3**

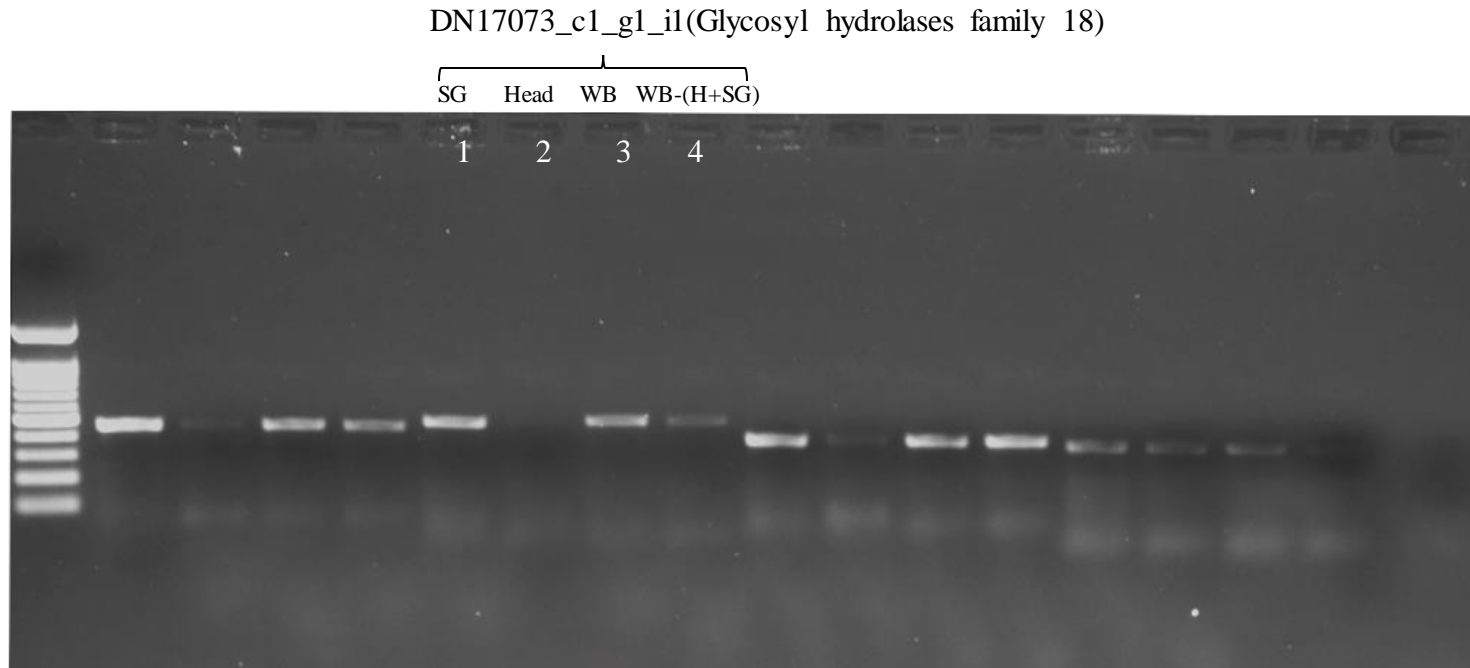

**Figure R3: RT-PCR amplification of potential effector encoding gene DN17073\_c1\_g1\_i1(Glycosyl hydrolases family 18).** The expression is checked in different tissues, SG (salivary gland), WB (whole body of insect), WB-(H+SG) (whole body without head and salivary gland). PCR samples were loaded into different wells denoted by numbers 1-4.

**Figure R4**

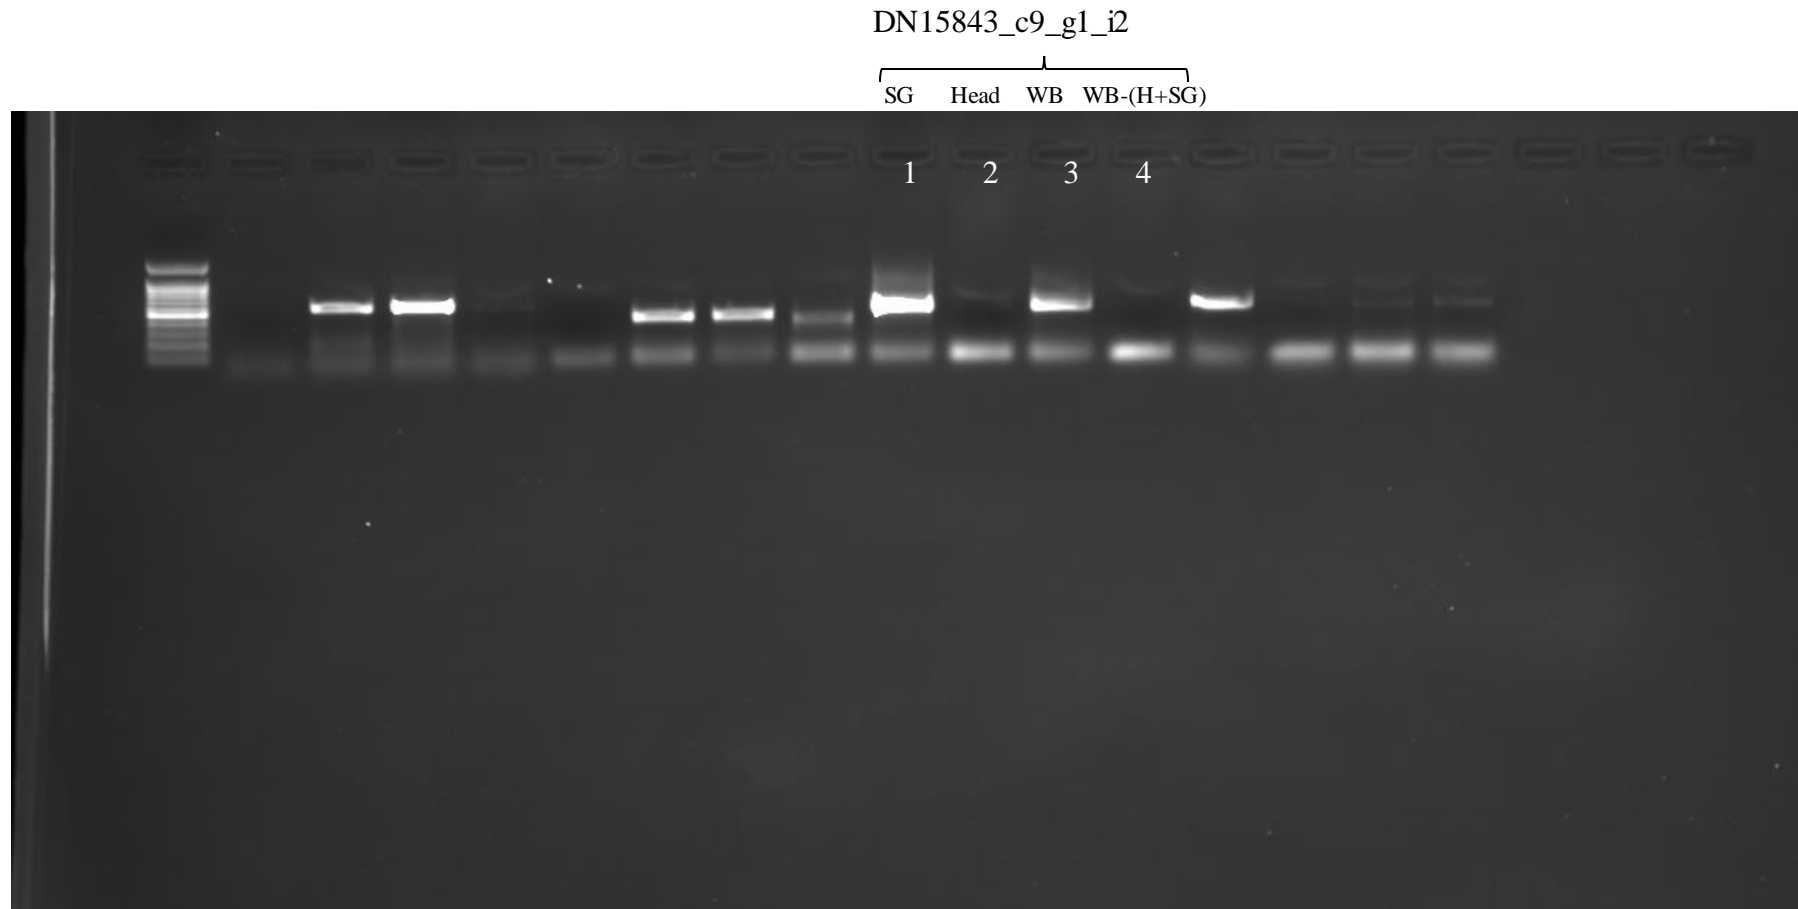

**Figure R4: RT-PCR amplification of potential effector encoding gene DN15843\_c9\_g1\_i2.** The expression is checked in different tissues, SG (salivary gland), WB (whole body of insect), WB-(H+SG) (whole body without head and salivary gland). PCR samples were loaded into different wells denoted by numbers 1-4.

**Figure R5**

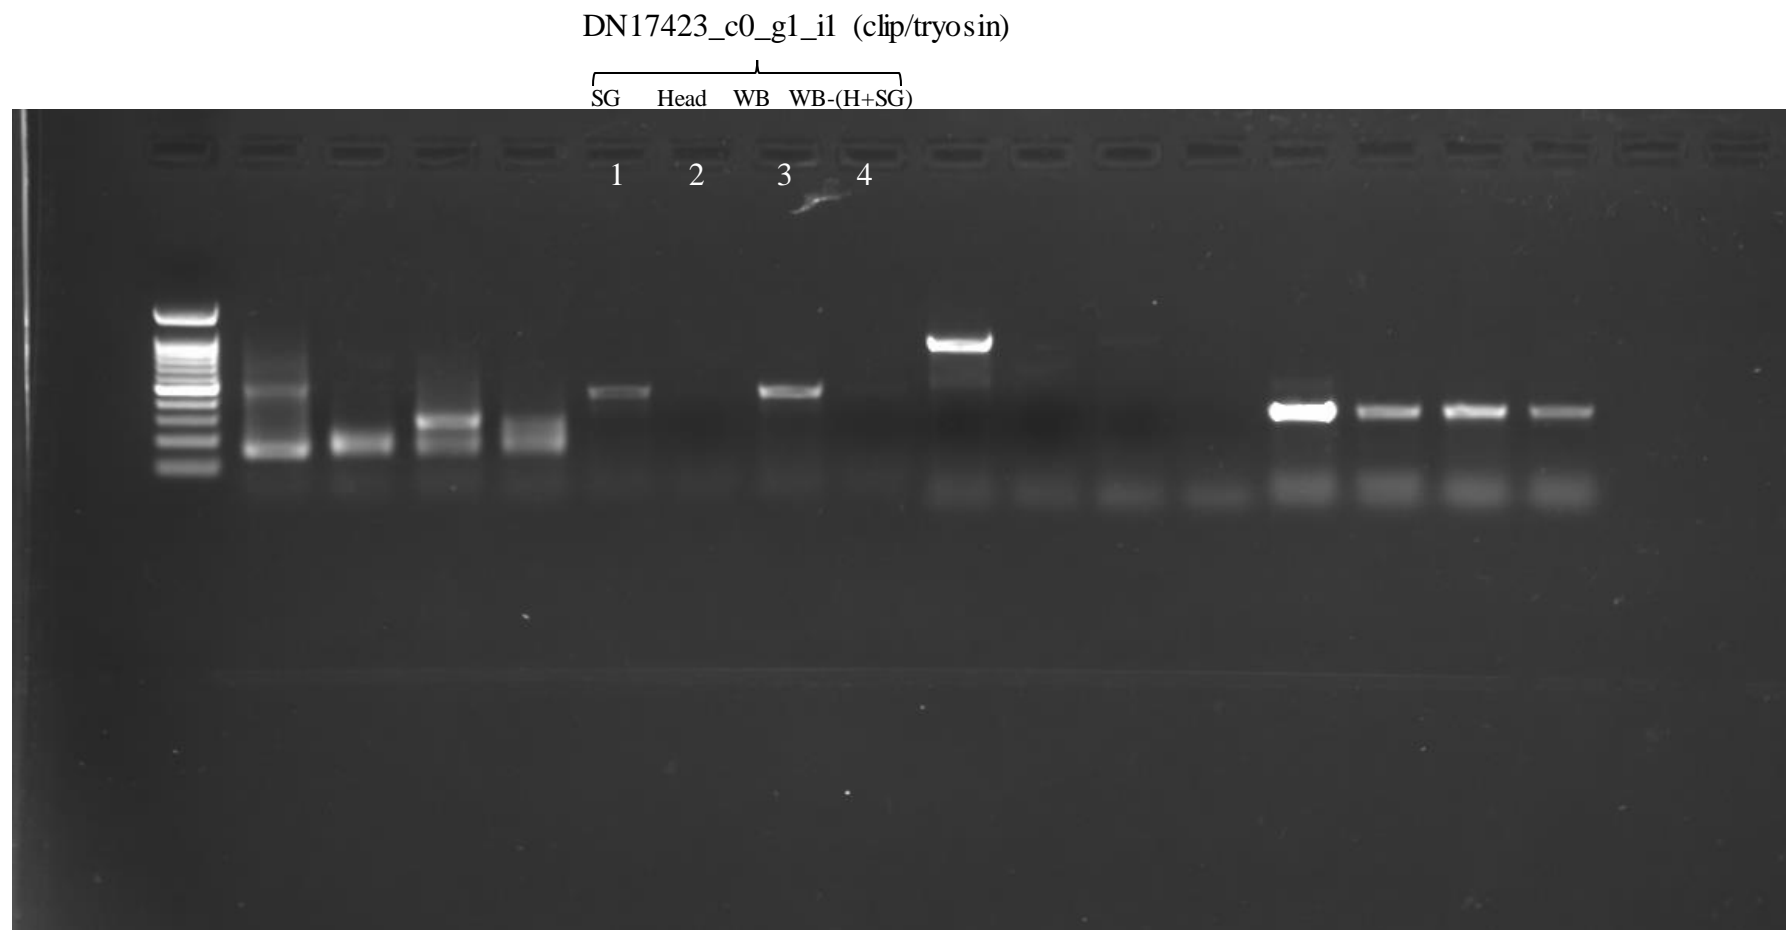

**Figure R5: RT-PCR amplification of potential effector encoding gene DN17423\_c0\_g1\_i1 (clip/tryosin).** The expression is checked in different tissues, SG (salivary gland), WB (whole body of insect), WB-(H+SG) (whole body without head and salivary gland). PCR samples were loaded into different wells denoted by numbers 1-4.

**Figure R6**

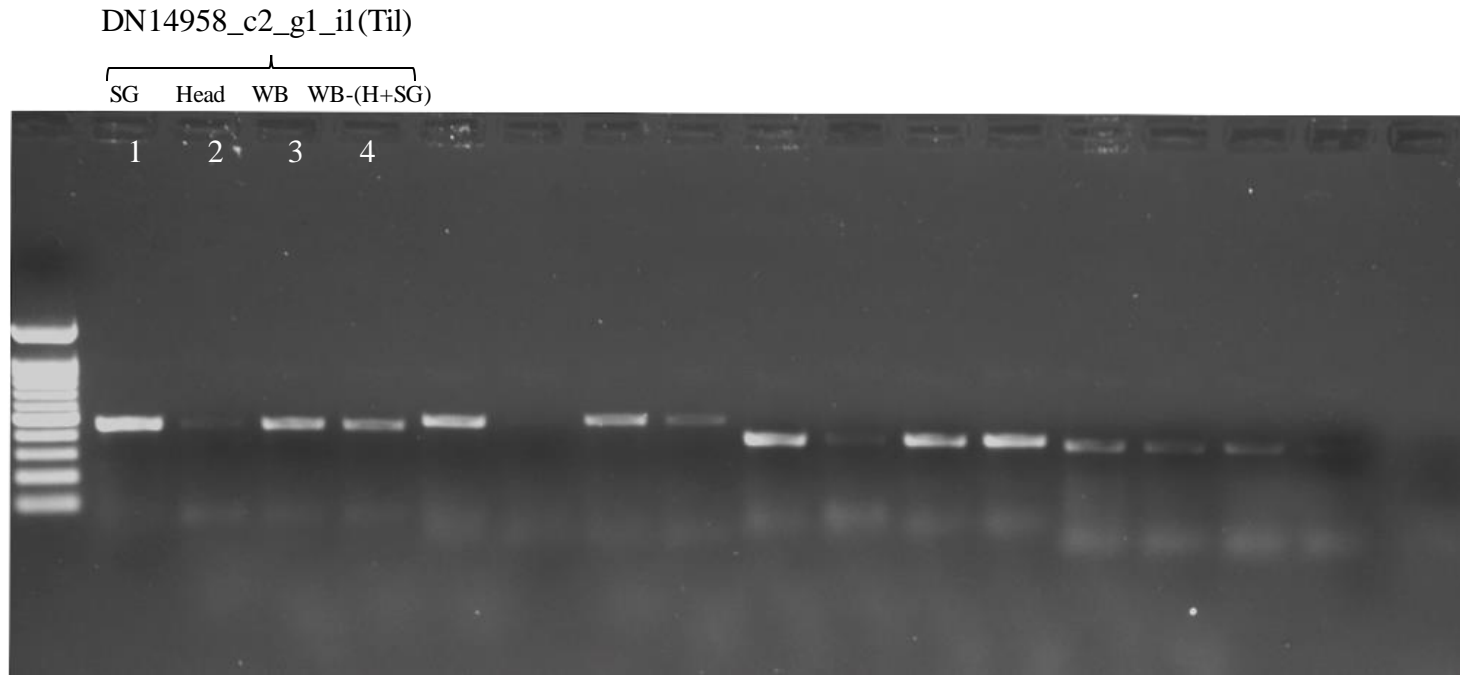

**Figure R6: RT-PCR amplification of potential effector encoding gene DN14958\_c2\_g1\_i1(Til).** The expression is checked in different tissues, SG (salivary gland), WB (whole body of insect), WB-(H+SG) (whole body without head and salivary gland). PCR samples were loaded into different wells denoted by numbers 1-4.

**Figure R7**

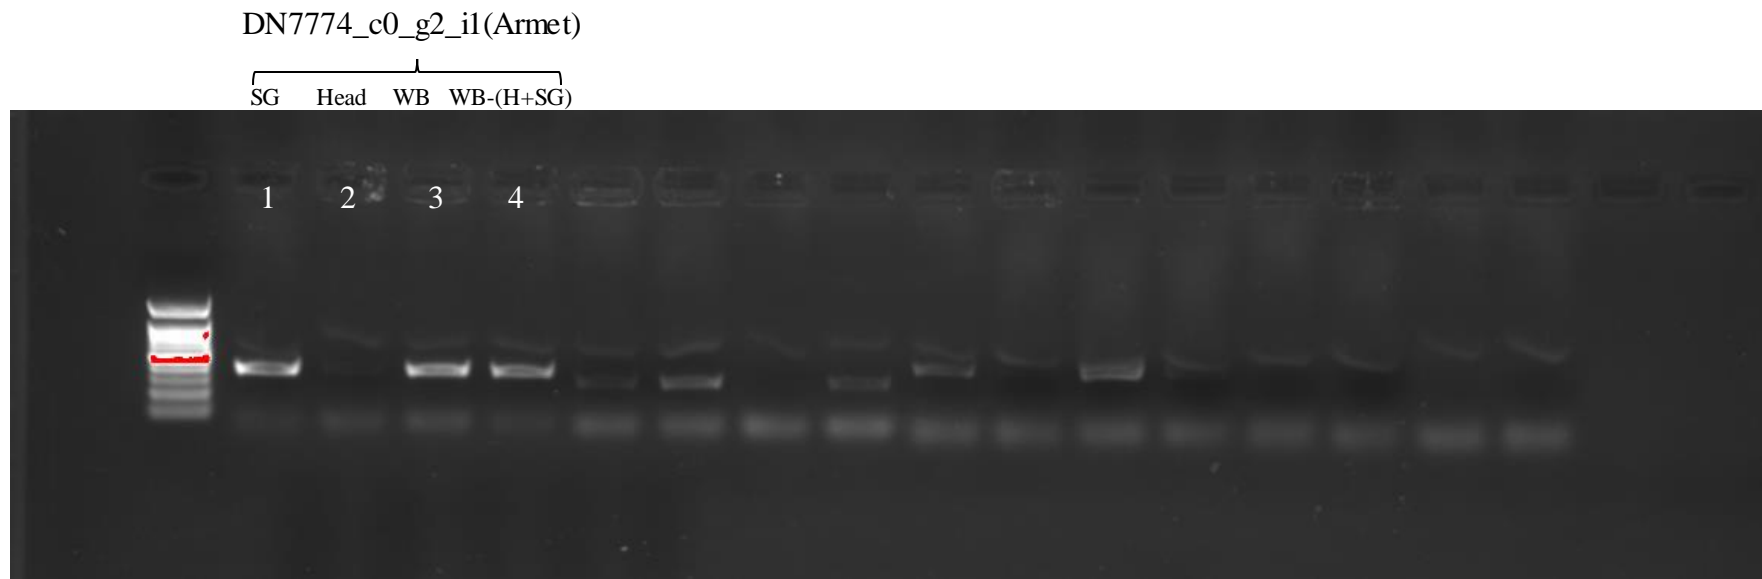

**Figure R7: RT-PCR amplification of potential effector encoding gene DN7774\_c0\_g2\_i1(Armet).** The expression is checked in different tissues, SG (salivary gland), WB (whole body of insect), WB-(H+SG) (whole body without head and salivary gland). PCR samples were loaded into different wells denoted by numbers 1-4.

**Figure R8**

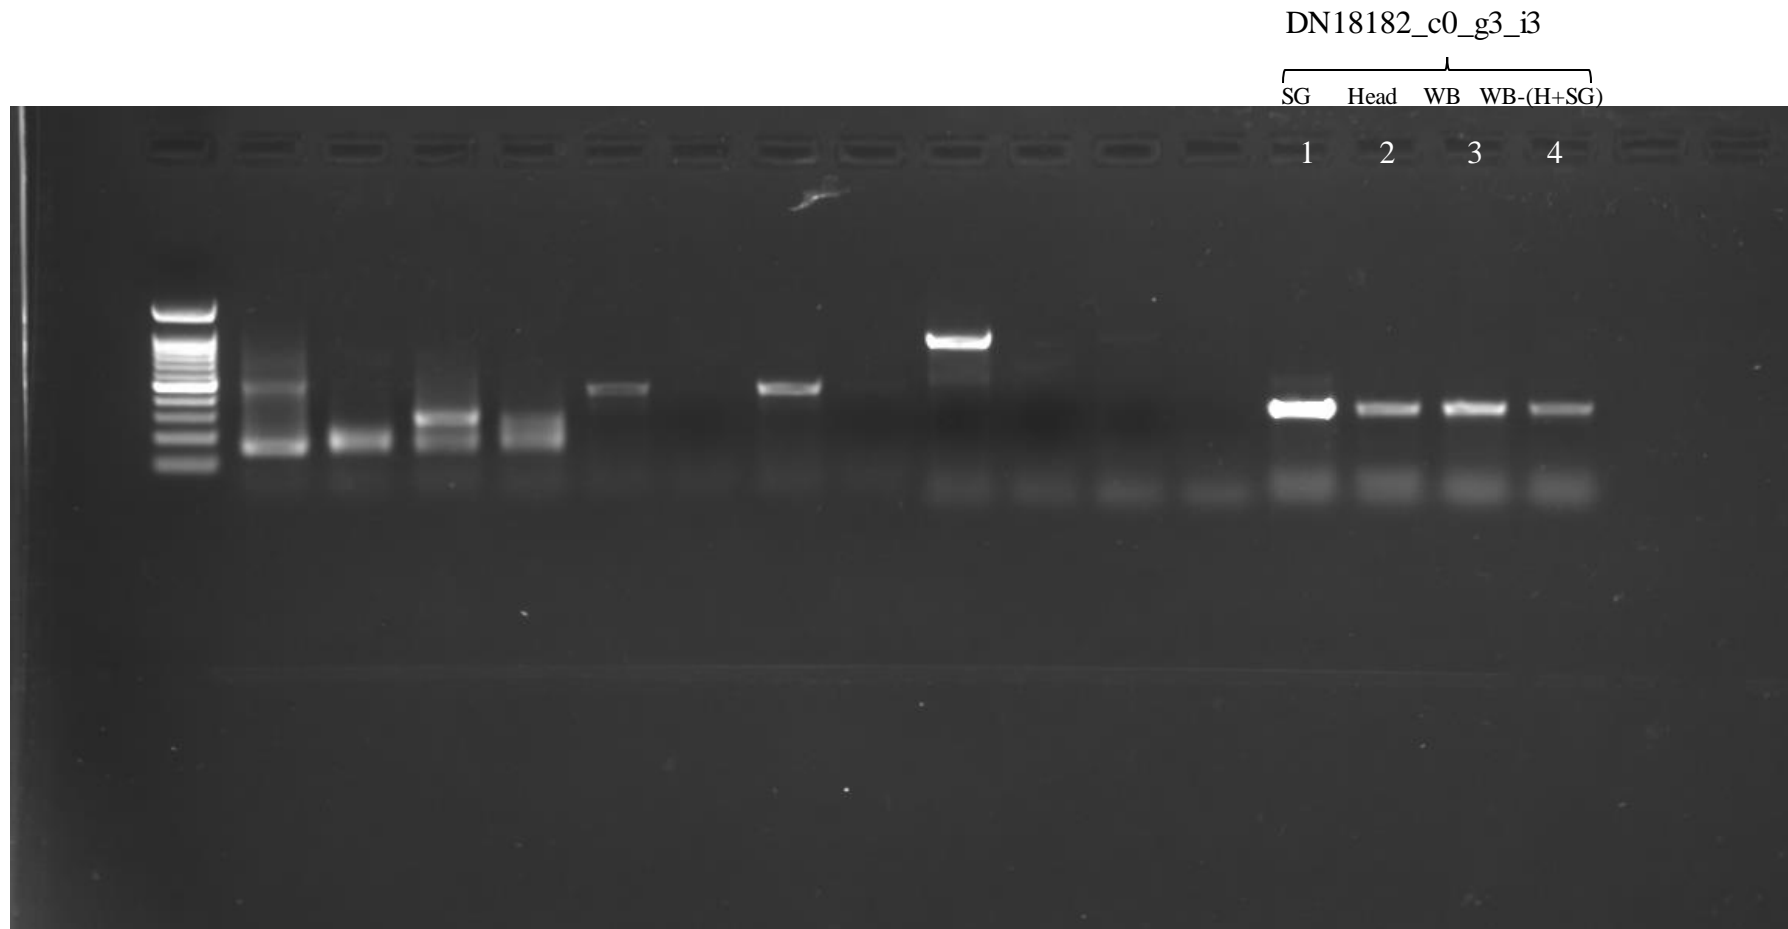

**Figure R8: RT-PCR amplification of potential effector encoding gene DN18182\_c0\_g3\_i3.** The expression is checked in different tissues, SG (salivary gland), WB (whole body of insect), WB-(H+SG) (whole body without head and salivary gland). PCR samples were loaded into different wells denoted by numbers 1-4.



**Figure R9**

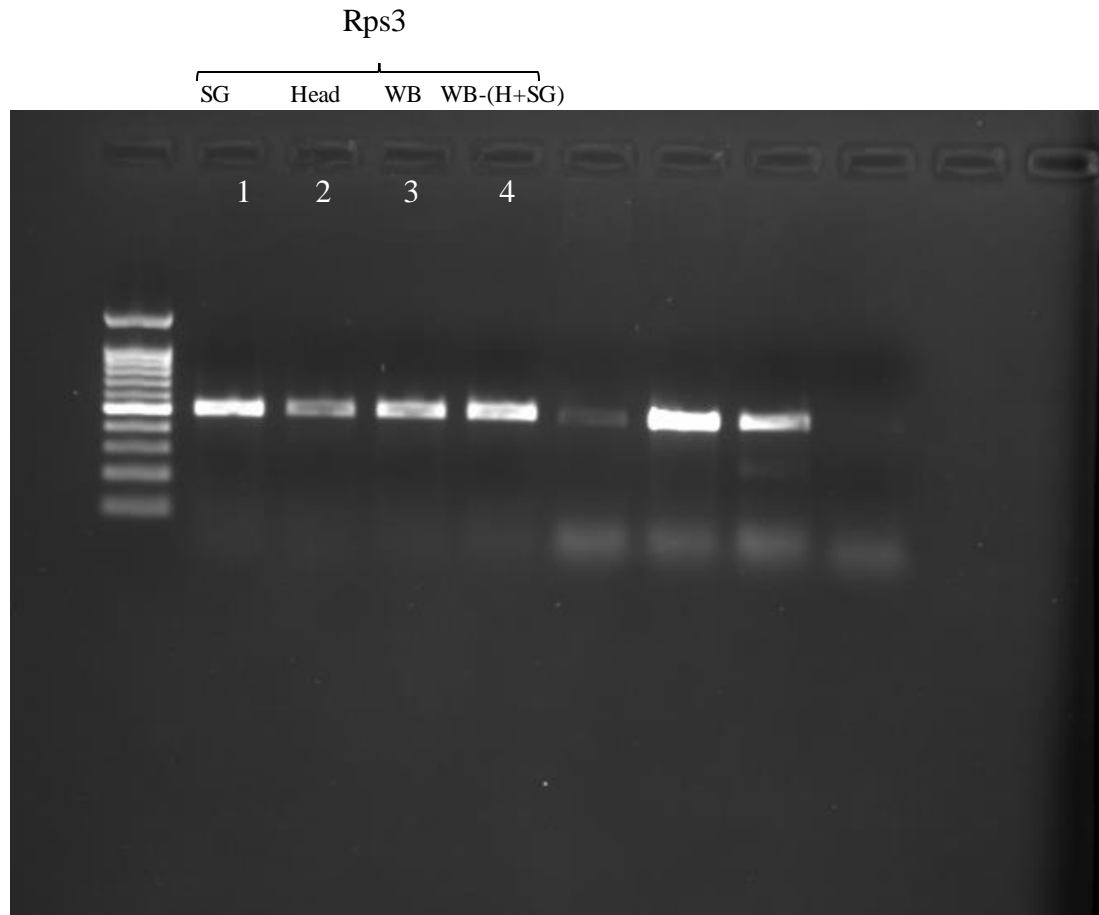

**Figure R9: RT-PCR amplification of insect house keeping encoding gene *RPS3*.** The expression is checked in different tissues, SG (salivary gland), WB (whole body of insect), WB-(H+SG) (whole body without head and salivary gland). PCR samples were loaded into different wells denoted by numbers 1-4.

**Figure R10**

DN21588\_c2\_g2\_i1(JHBP)

SG      Head      WB      WB-(H+SG)

1      2      3      4

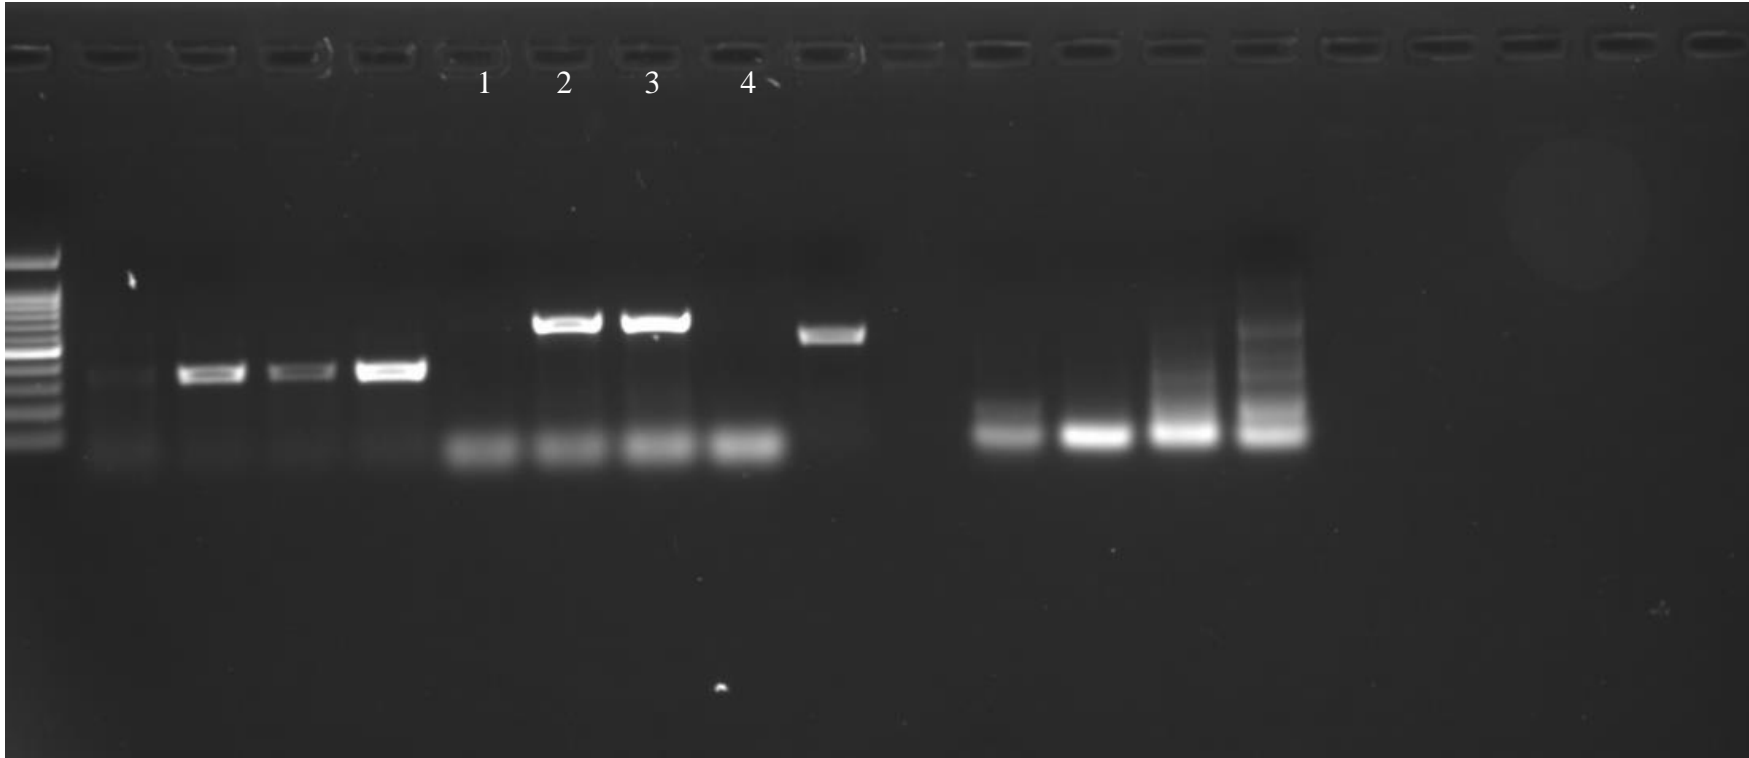

**Figure R10: RT-PCR amplification of potential effector encoding gene DN21588\_c2\_g2\_i1(JHBP).** The expression is checked in different tissues, SG (salivary gland), WB (whole body of insect), WB-(H+SG) (whole body without head and salivary gland). PCR samples were loaded into different wells denoted by numbers 1-4.

**Figure R11**

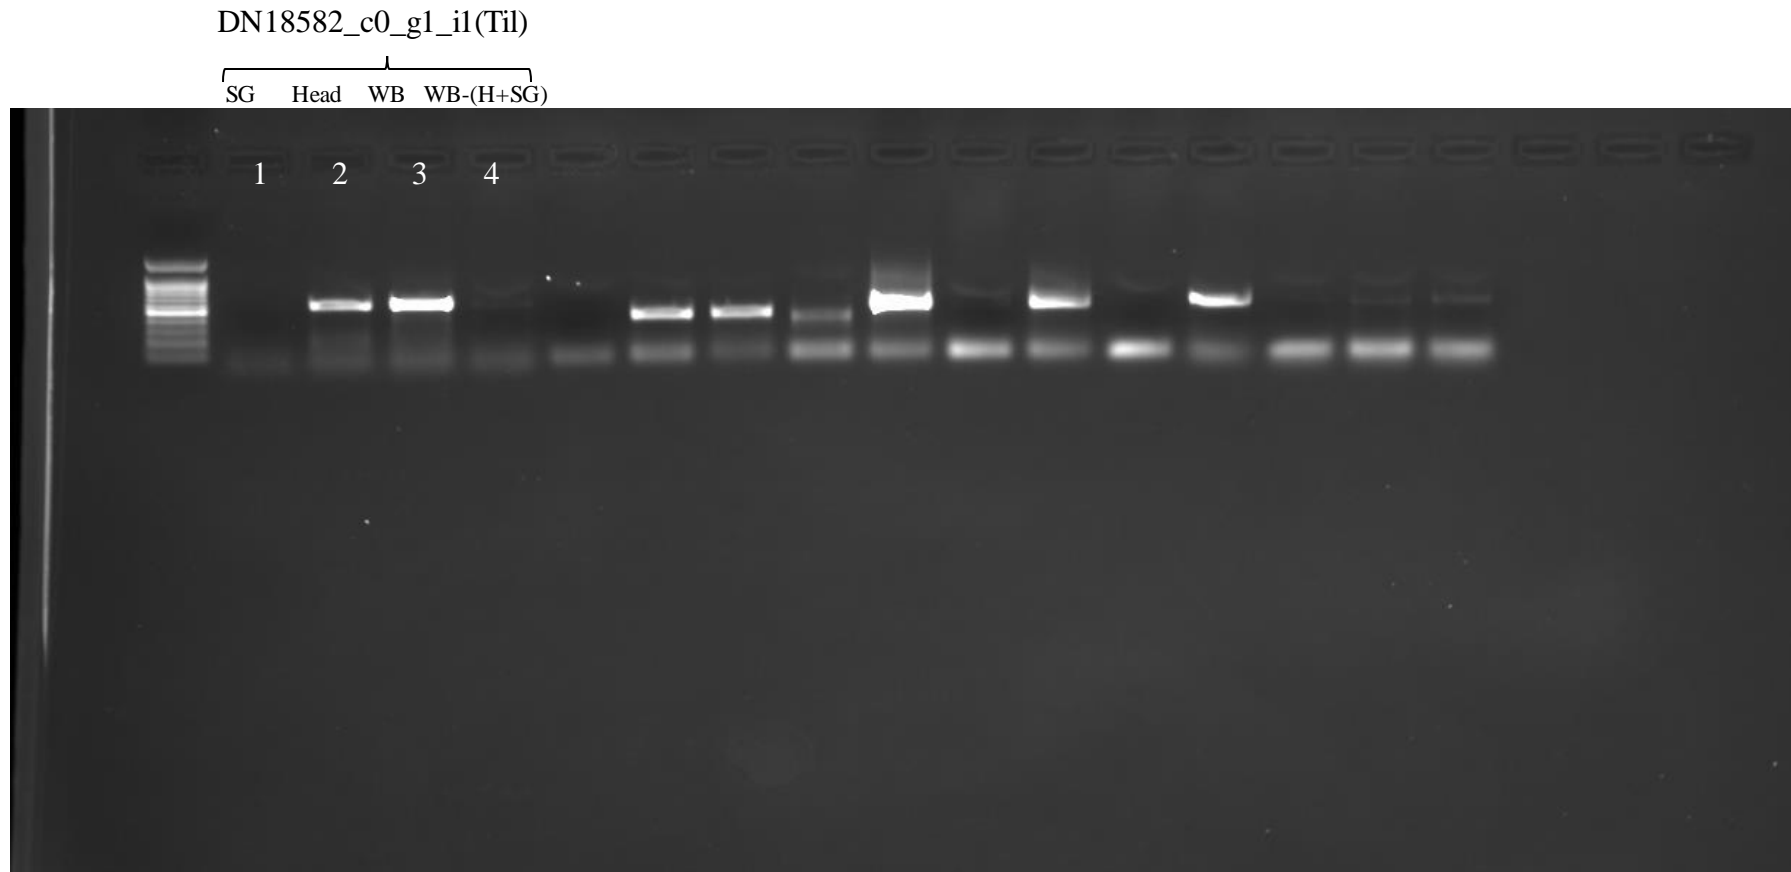

**Figure R11: RT-PCR amplification of potential effector encoding gene DN18582\_c0\_g1\_i1(Til).** The expression is checked in different tissues, SG (salivary gland), WB (whole body of insect), WB-(H+SG) (whole body without head and salivary gland). PCR samples were loaded into different wells denoted by numbers 1-4.

**Figure R12**

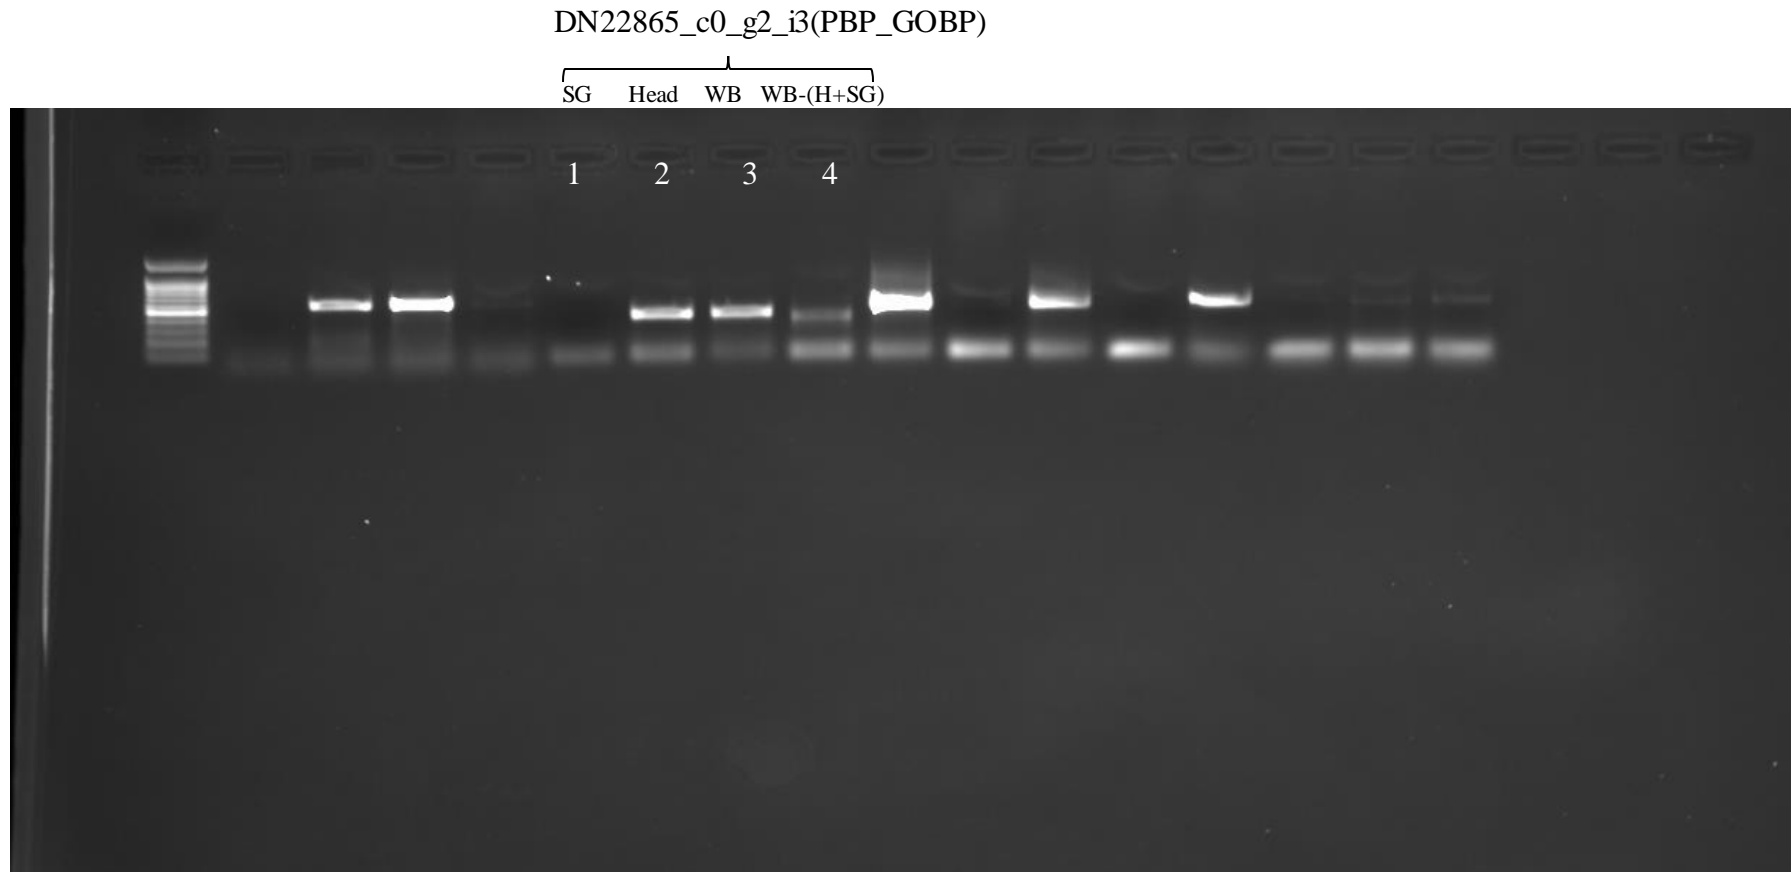

**Figure R12: RT-PCR amplification of potential effector encoding gene DN22865\_c0\_g2\_i3(PBP\_GOBP).** The expression is checked in different tissues, SG (salivary gland), WB (whole body of insect), WB-(H+SG) (whole body without head and salivary gland). PCR samples were loaded into different wells denoted by numbers 1-4.

**Figure R13**

DN16704\_c1\_g9\_i1(chitin\_bind\_4)

SG Head WB WB-(H+SG)

1 2 3 4

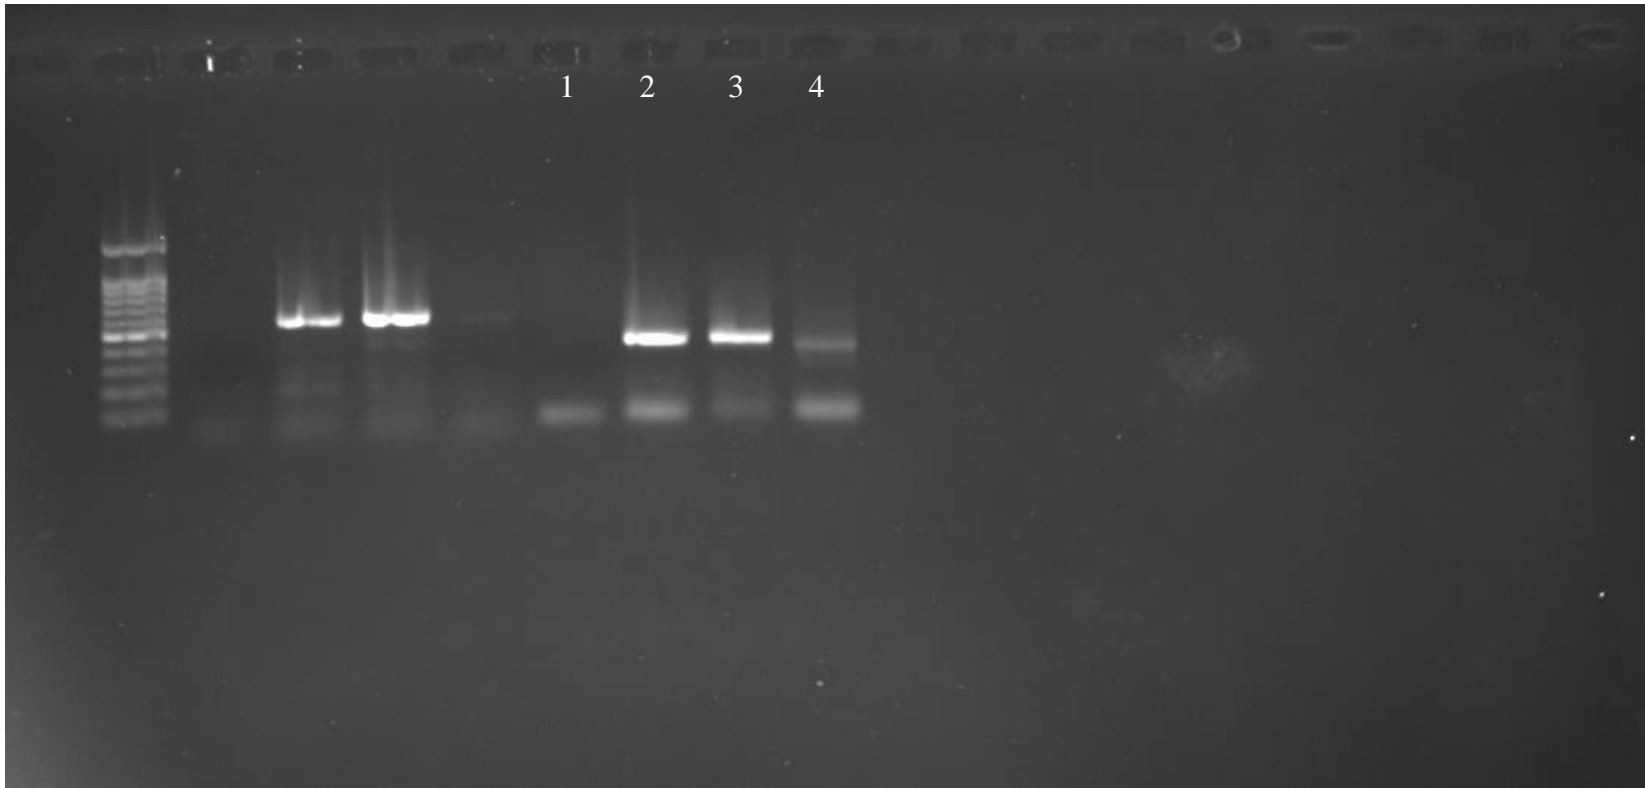

**Figure R13: RT-PCR amplification of potential effector encoding gene DN16704\_c1\_g9\_i1(chitin\_bind\_4).** The expression is checked in different tissues, SG (salivary gland), WB (whole body of insect), WB-(H+SG) (whole body without head and salivary gland). PCR samples were loaded into different wells denoted by numbers 1-4.

**Figure R14**

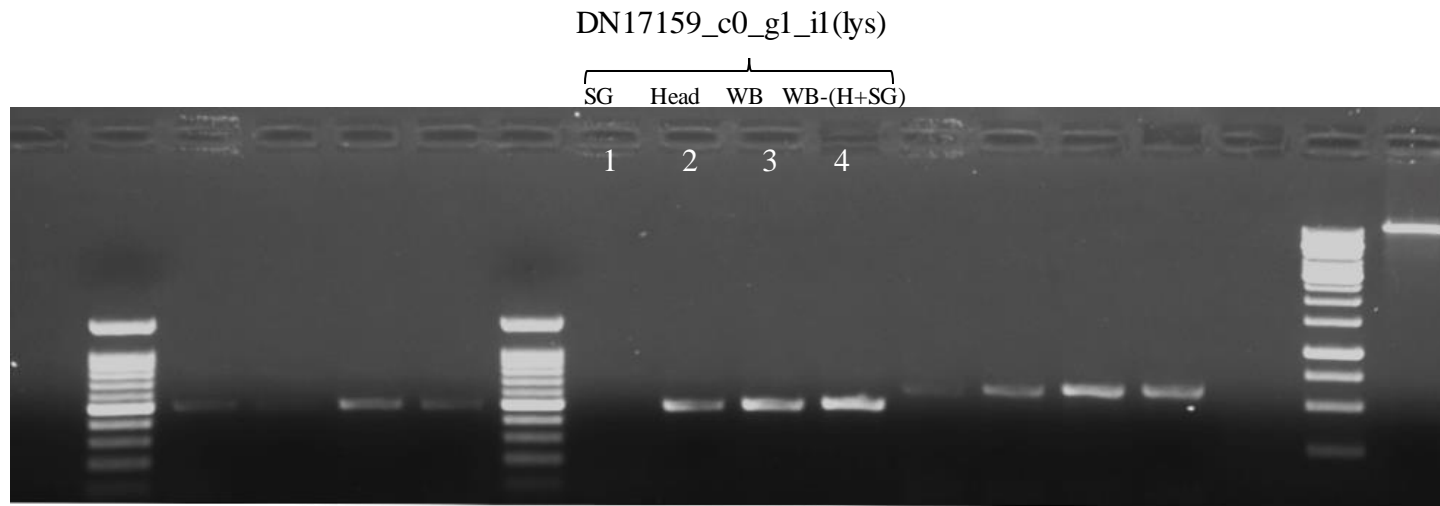

**Figure R14: RT-PCR amplification of potential effector encoding gene DN17159\_c0\_g1\_i1(lys).** The expression is checked in different tissues, SG (salivary gland), WB (whole body of insect), WB-(H+SG) (whole body without head and salivary gland). PCR samples were loaded into different wells denoted by numbers 1-4.

**Figure R15**

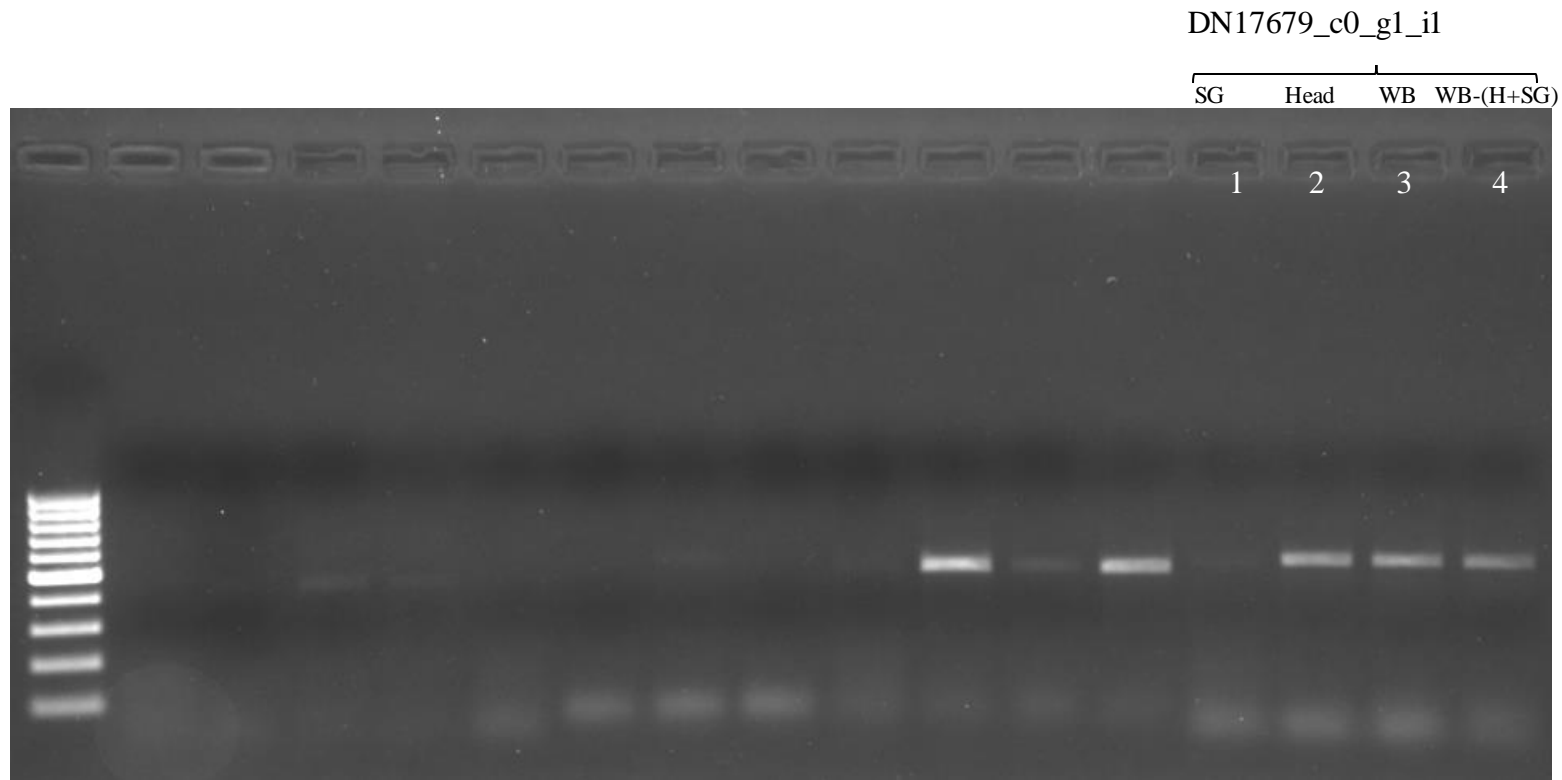

**Figure R15: RT-PCR amplification of potential effector encoding gene DN17679\_c0\_g1\_i1).** The expression is checked in different tissues, SG (salivary gland), WB (whole body of insect), WB-(H+SG) (whole body without head and salivary gland). PCR samples were loaded into different wells denoted by numbers 1-4.

**Figure R16**

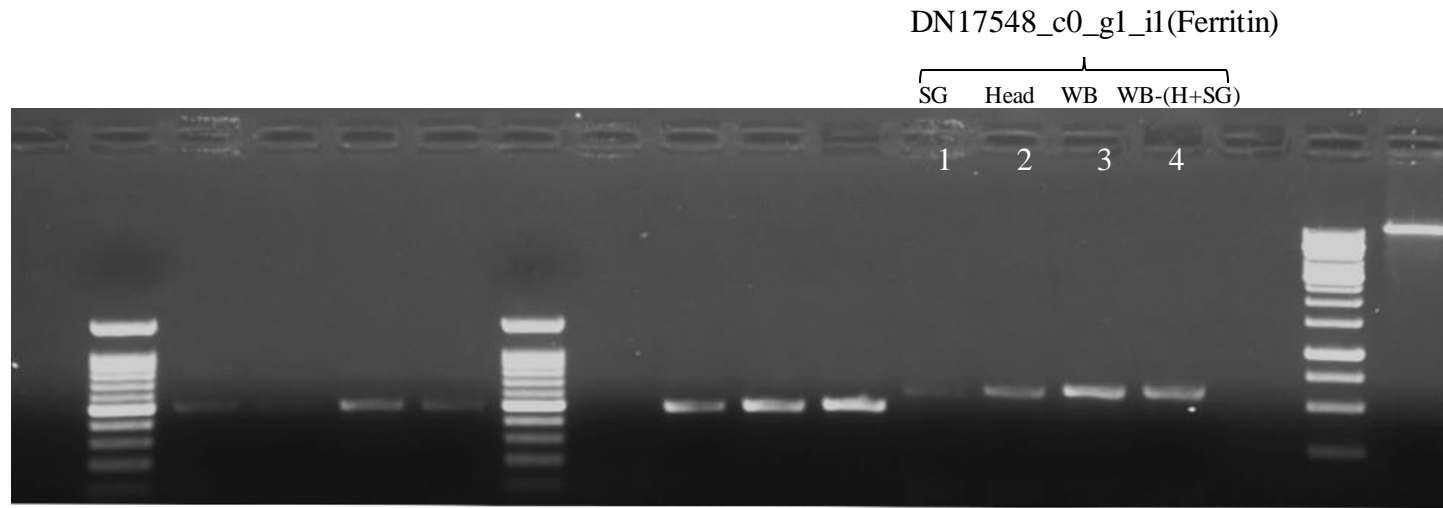

**Figure R16: RT-PCR amplification of potential effector encoding gene DN17548\_c0\_g1\_i1(Ferritin).** The expression is checked in different tissues, SG (salivary gland), WB (whole body of insect), WB-(H+SG) (whole body without head and salivary gland). PCR samples were loaded into different wells denoted by numbers 1-4.



**Figure R17**

DN22034\_c2\_g1\_i3(OS-D)

SG Head WB WB-(H+SG)

1 2 3 4

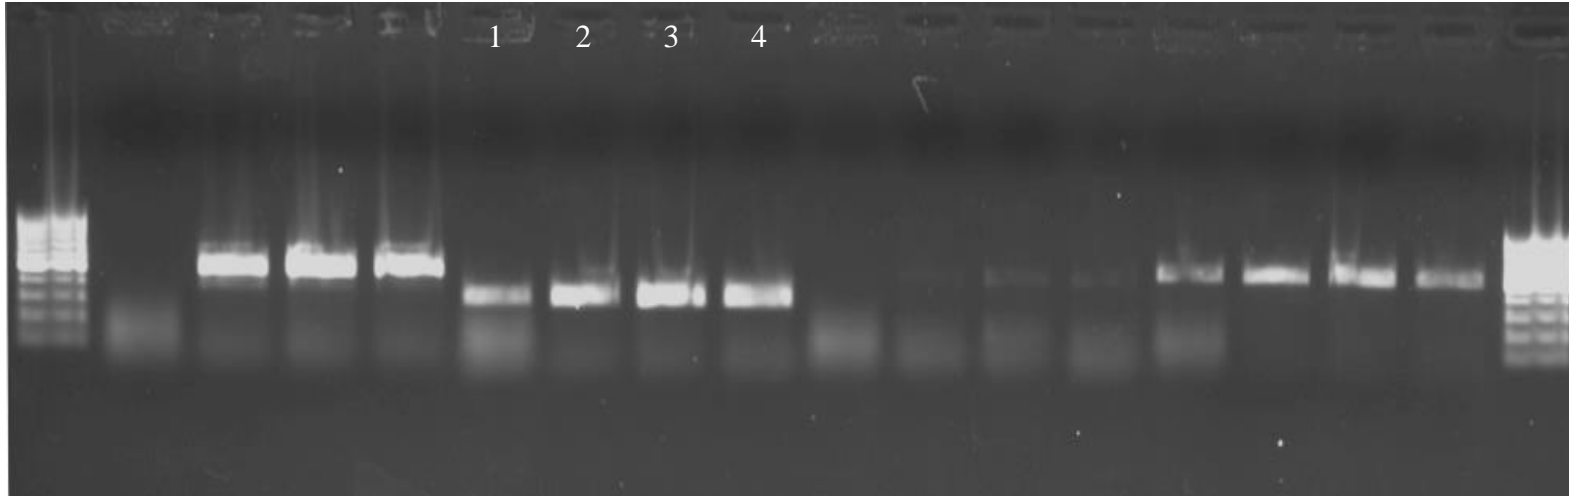

**Figure R17: RT-PCR amplification of potential effector encoding gene DN22034\_c2\_g1\_i3(OS-D).** The expression is checked in different tissues, SG (salivary gland), WB (whole body of insect), WB-(H+SG) (whole body without head and salivary gland). PCR samples were loaded into different wells denoted by numbers 1-4.
